# Supplementary material for: Strategies and Measurement Tools in Physical Activity Promotion Interventions in the University Setting: A Systematic Review
Source: Int J Environ Res Public Health. 2020 Sep 8;17(18):6526. doi: 10.3390/ijerph17186526 (PMC7557565; doi:10.3390/ijerph17186526)
Supplement: Supplementary file 1 [file ijerph-17-06526-s001.pdf]

**Table S1.** Strategies used to promote physical activity in the included studies.

|                       | Health Promotion Course (online or face-to face) | Sending Periodic Messages | Online Profile Creation (web or APP) | PA <sup>1</sup> , Exercise, or Sports Programs Attendance | Pedometer or Activity Tracker | Incentives to Attend Fitness Center | Training of PA Courses Teachers | Pre-Test Sensitization |
|-----------------------|--------------------------------------------------|---------------------------|--------------------------------------|-----------------------------------------------------------|-------------------------------|-------------------------------------|---------------------------------|------------------------|
| Annesi et al. [16]    |                                                  |                           |                                      |                                                           |                               |                                     |                                 |                        |
| Bang et al. [23]      |                                                  |                           |                                      |                                                           |                               |                                     |                                 |                        |
| Brown et al. [14]     |                                                  |                           |                                      |                                                           |                               |                                     |                                 |                        |
| Cameron et al. [24]   |                                                  |                           |                                      |                                                           |                               |                                     |                                 |                        |
| Heeren et al. [25]    |                                                  |                           |                                      |                                                           |                               |                                     |                                 |                        |
| Kattelman et al. [17] |                                                  |                           |                                      |                                                           |                               |                                     |                                 |                        |
| Kim et al. [20]       |                                                  |                           |                                      |                                                           |                               |                                     |                                 |                        |
| Nanney et al. [21]    |                                                  |                           |                                      |                                                           |                               |                                     |                                 |                        |
| Okazaki et al. [22]   |                                                  |                           |                                      |                                                           |                               |                                     |                                 |                        |
| Pope et al. [19]      |                                                  |                           |                                      |                                                           |                               |                                     |                                 |                        |
| Pope et al. [18]      |                                                  |                           |                                      |                                                           |                               |                                     |                                 |                        |
| Sharp et al. [15]     |                                                  |                           |                                      |                                                           |                               |                                     |                                 |                        |
| Sriramatr et al. [26] |                                                  |                           |                                      |                                                           |                               |                                     |                                 |                        |

<sup>1</sup> Physical activity

**Table S2.** Impact of the interventions implemented in included studies.

|                        | <b>Variables</b>                                                                        | <b>Between Groups Differences *</b>                                                                           | <b>Within Intervention Group Differences *</b>                                                        | <b>Within Control Group Differences *</b>            |
|------------------------|-----------------------------------------------------------------------------------------|---------------------------------------------------------------------------------------------------------------|-------------------------------------------------------------------------------------------------------|------------------------------------------------------|
| Annesi et al. [18]     | Leisure-time PA <sup>1</sup>                                                            |                                                                                                               | Yes                                                                                                   | Yes                                                  |
| Bang et al. [25]       | - Physical activity<br>- Health promoting behaviour<br>-MVPA <sup>2</sup>               | No (PA)<br>Yes (health promoting behaviour)                                                                   |                                                                                                       |                                                      |
| Brown et al. [16]      | -PA Action Planning<br>-PA Outcome expectancies                                         | Yes (MVPA and PA action planning)                                                                             |                                                                                                       |                                                      |
| Cameron et al. [26]    | Physical activity per week                                                              | No                                                                                                            |                                                                                                       |                                                      |
| Heeren et al. [27]     | Physical activity during the last week.                                                 | Yes (vigorous PA at 6 months)<br>Yes (moderate PA and vigorous PA at 12 months)                               |                                                                                                       |                                                      |
| Kattelmann et al. [19] | Physical activity per week.                                                             | Yes (vigorous PA in women for 3-months)                                                                       | Yes (moderate PA at 3 months and 15 months)<br>Sedentary times increment                              | Yes (moderate PA at 3 months and 15 months)          |
| Kim et al. [21]        | Physical activity per week                                                              | No                                                                                                            | Light intensity PA reduction.                                                                         | MVPA reduction                                       |
| Nanney et al [23].     | - PA<br>- Steps/day<br>- PA enjoyment<br>- State of Change<br>- Motivation to be active | No (main study)<br>Yes (steps/days on the substudy)                                                           | Increment of PA from time 0 to mid-semester.<br>Reduction of PA from mid-semester to end of semester. |                                                      |
| Okazaki et al. [22]    | - Physical activity per week<br>- State of Change                                       | Yes (energy expenditure on non-engaged in sports subgroup in the intervention group)<br>Yes (State of change) | Yes (state of change)                                                                                 | Yes (state of changes on subgroup engaged in sports) |

|                       |                                            |                                                                                                   |                                            |                                            |
|-----------------------|--------------------------------------------|---------------------------------------------------------------------------------------------------|--------------------------------------------|--------------------------------------------|
| Pope et al. [21]      | Gym center attendance                      | Yes                                                                                               | Reduction across the semester              | Reduction across the semester              |
| Pope et al. [20]      | - Gym center attendance                    | Yes (during the fall semester, between the control condition and the incentive conditions)        |                                            |                                            |
|                       | - Motivation to be active                  | Yes (during the spring semester, between the continued-incentive group and the other two groups)  |                                            |                                            |
| Sharp et al. [17]     | -Physical activity<br>-Leisure time PA     | No                                                                                                | Mild PA increment<br>Vigorous PA reduction | Mild PA increment<br>Vigorous PA reduction |
| Sriramatr et al. [28] | - Leisure time PA                          | Yes (steps/ day, leisure time physical activity and SOC variables at the 3 and 6 month follow-up) |                                            |                                            |
|                       | - steps/day<br>-SOC <sup>3</sup> variables | No (for pretest sensitization)                                                                    |                                            |                                            |

---

\*statistically significant <sup>1</sup>PA: Physical activity <sup>2</sup>MVPA: Moderate-to-vigorous Physical activity <sup>3</sup>SOC: Social Cognitive Theory
